# 1           **Global drivers of obligate mycorrhizal symbionts diversification**

2

3

4   Benoît Perez-Lamarque <sup>1,2\*</sup>, Maarja Õpik <sup>3</sup>, Odile Maliet <sup>1</sup>, Ana C. Afonso Silva <sup>1</sup>, Marc-  
5   André Selosse <sup>2,4</sup>, Florent Martos <sup>2</sup>, and Hélène Morlon <sup>1</sup>

6

7

8   <sup>1</sup> *Institut de biologie de l'École normale supérieure (IBENS), École normale supérieure, CNRS,*  
9   *INSERM, Université PSL, 46 rue d'Ulm, 75 005 Paris, France*

10   <sup>2</sup> *Institut de Systématique, Évolution, Biodiversité (ISYEB), Muséum national d'histoire naturelle,*  
11   *CNRS, Sorbonne Université, EPHE, UA, CP39, 57 rue Cuvier 75 005 Paris, France*

12   <sup>3</sup> *University of Tartu, 40 Lai Street, 51 005 Tartu, Estonia*

13   <sup>4</sup> *Department of Plant Taxonomy and Nature Conservation, University of Gdansk, Wita Stwosza*  
14   *59, 80-308 Gdansk, Poland*

15

16   \* *corresponding author: benoit.perez@ens.psl.eu; ORCID: 0000-0001-7112-7197*

17 ***Abstract (200 words):***

18

19 Arbuscular mycorrhizal fungi (AMF) are widespread microscopic fungi that provide  
20 mineral nutrients to most land plants by forming one of the oldest terrestrial symbioses.  
21 They have sometimes been referred to as an “evolutionary cul-de-sac” for their limited  
22 species diversity and their ecological niches restricted to plant-symbiotic life style. Here  
23 we use the largest global database of AMF to analyze their diversification dynamics in the  
24 past 500 million years (Myr) based on the small subunit (SSU) rRNA gene. We demonstrate  
25 that overall the SSU rRNA gene is variable enough to delineate AMF species and find that  
26 AMF have low diversification rates. After a diversification peak around 150 Myr ago, they  
27 experienced an important diversification slowdown in the last 100 Myr, likely related to a  
28 shrinking of their mycorrhizal niches. Our results identify patterns and drivers of  
29 diversification in a group of obligate symbionts of major ecological and evolutionary  
30 importance. They also highlight a striking example of a diversification slowdown that,  
31 instead of reflecting an adaptive radiation as typically assumed, may result from a limited  
32 ability to colonize new niches in an evolutionary cul-de-sac.

33

## 34 *Introduction:*

35

36 Arbuscular mycorrhizal fungi (AMF - subphylum Glomeromycotina) are obligate  
37 symbionts sometimes referred to as an “evolutionary cul-de-sac, albeit an enormously  
38 successful one” [1, 2]. They have limited morphological and species diversities, yet  
39 associate with the roots of >80% of land plants, where they provide mineral resources in  
40 exchange for photosynthates [3]. Present in most terrestrial ecosystems, AMF play key  
41 roles in plant protection, nutrient cycling, and ecosystem functions [4]. Fossil evidence and  
42 molecular phylogenies suggest that AMF contributed to the emergence of land plants [5–  
43 8] and coevolved with them for more than 400 million years (Myr)[8–10].

44 Despite the ecological ubiquity and evolutionary importance of AMF, large-scale  
45 patterns of their evolutionary history are poorly known. Studies on the diversification of  
46 AMF have been hampered by the difficulty of delineating species, quantifying global scale  
47 species richness, and building a robust phylogenetic tree for this group. Indeed, AMF are  
48 microscopic soil- and root-dwelling fungi that are poorly differentiated morphologically  
49 and difficult to cultivate. Although their classical taxonomy is mostly based on the  
50 characters of spores and root colonization [3, 11], AMF species delineation has greatly  
51 benefited from molecular data [12]. Experts have defined “virtual taxa” (VT) based on a  
52 minimal 97% similarity of a region of the 18S small subunit (SSU) rRNA gene and  
53 monophyly criteria [13, 14]. As for many other pragmatic species concepts, VT have rarely  
54 been tested for their biological relevance [15], and a consensual system of AMF  
55 classification is still lacking [16]. AMF are also poorly known genetically: the full SSU  
56 rRNA gene sequence is known in few species [17], other gene sequences in even fewer [10,  
57 18], and complete genomes in very few [19].

58 The drivers of AMF diversification are unknown. A previous dated phylogenetic  
59 tree of VT found that many speciations occurred after the last major continental  
60 reconfiguration around 100 Myr ago [20], suggesting that AMF diversification is not linked  
61 to vicariant speciation during this geological event. Still, geographical speciation could  
62 play an important role in AMF diversification, as these organisms have spores that disperse

63 efficiently [21–23], which could result in frequent founder-event speciation [24]. Other  
64 abiotic factors include habitat: tropical grasslands have, for example, been suggested as  
65 diversification hotspots for AMF [25]. Besides abiotic factors, AMF are obligate symbionts  
66 and, although relatively generalist [4, 26, 27], their evolutionary history could be largely  
67 influenced by a diffuse coevolution with their host plants [10, 28, 29]. Over the last 400  
68 Myr, land plants have experienced massive extinctions and radiations [29, 30], adaptations  
69 to various ecosystems [31, 32], and associations with different soil microorganisms [33, 34].  
70 All these factors could have influenced diversification dynamics in AMF.

71         Here, we reconstruct several thoroughly sampled phylogenetic trees of AMF,  
72 considering several criteria of species delineations and uncertainty in phylogenetic  
73 reconstructions. We combine this phylogenetic data with paleoenvironmental data and  
74 data of current AMF geographic distributions, ecological traits, interaction with host  
75 plants, and genetic diversity to investigate the global patterns and drivers of AMF  
76 diversification in the last 500 Myr.

77 ***Material & methods:***

78

79 **Database choice:**

80

81 We used AMF SSU rRNA gene sequences from MaarjAM database, the largest  
82 global database of AMF gene sequences [13]. Ideally, our analyses would be based on  
83 several independent genomic regions, however such data has yet to be acquired. In fungi,  
84 the usual barcode is the ITS region. However, for several reasons the SSU rRNA gene has  
85 been preferred over the ITS in AMF [35], and therefore ITS data on AMF are currently less  
86 common. In addition, we confirmed using the dataset of [35] that the ITS are very difficult  
87 to align, preventing us from reconstructing a robust phylogeny to investigate AMF  
88 evolutionary history (Supplementary Fig. 1).

89

90 **Virtual taxa phylogenetic reconstruction:**

91

92 We reconstructed several Bayesian phylogenetic trees of the 384 VT from the  
93 corresponding representative sequences available in the MaarjAM database [13] updated  
94 in June 2019 (Supplementary Methods 1). We used the full length (1,700 base pairs) SSU  
95 rRNA gene sequences from [17] to better align the VT sequences using MAFFT [36]. We  
96 selected the 520 base pair central variable region of the VT aligned sequences and  
97 performed a Bayesian phylogenetic reconstruction using BEAST2 [37]. We obtained a  
98 consensus VT tree and selected 12 trees equally spaced in 4 independent Bayesian chains  
99 to account for phylogenetic uncertainty in the subsequent diversification analyses,  
100 hereafter referred to as the VT replicate trees. We set the crown root age at 505 Myr [20],  
101 which is coherent with fossil data and previous dated molecular phylogenies [8, 10].

102

103 **Delineation into Evolutionary Units (EUs):**

104

105 We considered several ways to delineate AMF species based on the SSU rRNA gene.  
106 In addition to the VT species proxy, we delineated AMF *de novo* into evolutionary units  
107 (EUs) using 5 different thresholds of sequence similarity ranging from 97 to 99% and a  
108 monophyly criterion. We gathered 36,411 AMF sequences of the SSU rRNA gene from  
109 MaarjAM, mainly amplified by the primer pair NS31–AML2 (variable region) [38, 39]  
110 (dataset 1, Supplementary Table 1), corresponding to 27,728 haplotypes. We first built a  
111 phylogenetic tree of these haplotypes and then applied to this tree our own algorithm (R-  
112 package RPANDA [40, 41]) that traverses the tree from the root to the tips, at every node  
113 computes the average similarity of all sequences descending from the node, and collapses  
114 the sequences into a single EU if their sequence dissimilarity is lower than a given  
115 threshold (Supplementary Methods 2). Finally, we performed Bayesian phylogenetic  
116 reconstructions of the EUs using BEAST2, following the procedure described in  
117 Supplementary Methods 1.

118

#### 119 **Coalescent-based species delineation analyses:**

120

121 Finally, we considered the Generalized Mixed Yule Coalescent method (GMYC) [42,  
122 43], a species delineation approach that does not require specifying an arbitrary similarity  
123 threshold. GMYC estimates the time  $t$  in a reconstructed calibrated tree that separates  
124 species diversification (Yule process – before  $t$ ) and intraspecific differentiation (coalescent  
125 process – after  $t$ ). GMYC is too computationally intensive to apply on the 36,411 SSU  
126 sequences; we used it here on three smaller clades to investigate the ability of the SSU gene  
127 to delineate AMF species despite its slow evolution [16], and as a way to evaluate the  
128 biological relevance of the VT and various EUs delineations. We selected the following  
129 AMF clades: the family Claroideoglomeraceae; the order Diversisporales; and an early-  
130 diverging clade composed of the orders Archaeosporales and Paraglomerales. For each  
131 clade, we reconstructed Bayesian phylogenetic trees of haplotypes following the procedure  
132 described in Supplementary Methods 1. We then ran GMYC analyses (splits R-package  
133 [44]) on each of these trees and evaluated the support of the GMYC model compared to a

134 null model in which all tips are assumed to be different species, using a likelihood ratio  
135 test (LRT). If the LRT supports the GMYC model, different SSU haplotypes belong to the  
136 same AMF species, *i.e.* the SSU rRNA gene has time to accumulate substitutions between  
137 AMF speciation events.

138

### 139 **Total diversity estimates:**

140

141 We evaluated how thoroughly sampled our species-level AMF phylogenetic trees  
142 are by estimating the total number of VT and EUs using rarefaction curves and the  
143 Bayesian Diversity Estimation Software (BDES [45]) (Supplementary Methods 3).

144

### 145 **Diversification analyses:**

146

147 We estimated lineage-specific diversification rates using ClaDS, a Bayesian  
148 diversification model that accounts for rate heterogeneity by modeling small rate shifts at  
149 speciation events [46]. At each speciation event, the descending lineages inherit new  
150 speciation rates sampled from a log-normal distribution with an expected value  $\log[\alpha \times \lambda]$   
151 (where  $\lambda$  represents the parental speciation rate and  $\alpha$  is a trend parameter) and a standard  
152 deviation  $\sigma$ . We considered the model with constant turnover  $\varepsilon$  (*i.e.* constant ratio between  
153 extinction and speciation rates; *ClaDS2*) and ran a newly developed ClaDS algorithm based  
154 on data augmentation techniques which enables us to estimate mean rates through time  
155 ([https://github.com/OdileMaliet/ClaDS\\_Julia](https://github.com/OdileMaliet/ClaDS_Julia)). We ran ClaDS2 with 3 independent chains,  
156 checked their convergence using a Gelman-Rubin diagnostic criterion [47], and recorded  
157 lineage-specific speciation rates. We also recorded the estimated hyperparameters ( $\alpha$ ,  $\sigma$ ,  $\varepsilon$ )  
158 and the value  $m = \alpha \times \exp(\sigma^2/2)$ , which indicates the general trend of the rate through time  
159 [46].

160

161 In addition, we applied TreePar [48], another diversification approach that does not  
162 consider rate variation across lineages, but models temporal shifts in diversification rates

163 affecting all lineages simultaneously. We searched for up to ten shifts in diversification  
164 rates at every 2-million-year interval in each phylogenetic tree. We estimated the number  
165 of temporal shifts in AMF diversification rates using maximum likelihood inferences and  
166 likelihood ratio tests. We also used CoMET, its equivalent piecewise-constant model in a  
167 Bayesian framework (TESS R-package [49, 50]). We chose the Bayesian priors according to  
168 maximum likelihood estimates from TreePar, disallowed mass extinction events, and ran  
169 the MCMC chains until convergence (minimum effective sample sizes of 500).

170

171 We also fitted a series of time-dependent and environment-dependent birth-death  
172 diversification models using RPANDA [40, 51] to test the influence of temperature, pCO<sub>2</sub>,  
173 and land plant fossil diversity on AMF diversification. For the time-dependent models, we  
174 considered models with constant or exponential variation of speciation rates through time  
175 and null or constant extinction rates (*fit\_bd* function). Models with constant rates  
176 correspond to the null hypothesis of clock-like speciation, whereas the exponential  
177 variation ensures positive rates and are an approximation of diversity dependence, a  
178 process often invoked during radiations [52]. For the environment-dependent models, we  
179 considered an exponential dependency of the speciation rates with the environmental  
180 variable (*env*), *i.e.* speciation rate= $b \cdot \exp(a \cdot \text{env})$ , where *a* and *b* are two parameters  
181 estimated by maximum likelihood (*fit\_env* function). The exponential variation  
182 corresponds here to a simple linear regression of log-transformed rates. Environment  
183 curves were smoothed using the function *smooth.spline* (stats R-package). We used the  
184 corrected Akaike information criterion (AICc) to select the best-fit models, considering that  
185 a difference of 2 in AICc indicates that the model with the lowest AICc is better.

186 The influence of temperature was tested on the complete AMF phylogenetic trees,  
187 using estimates of past global temperature [53]. As these temporal analyses can be sensitive  
188 to the root age calibration, we replicated them using the youngest (437 Myr) and oldest  
189 (530 Myr) crown age estimates from [10]. The influence of pCO<sub>2</sub> [54] and of land plant fossil  
190 diversity was tested starting from 400 Myr ago, as these environmental data are not  
191 available for more ancient times. For these analyses we sliced the phylogenies at 400 and



192 200 Myr ago, and applied the diversification models to the sliced sub-trees larger than 50  
193 tips. Estimates of land plant diversity were obtained using all available Embryophyta  
194 fossils from the Paleobiology database (<https://paleobiodb.org>) and using the shareholder  
195 quorum subsampling method (Supplementary Methods 4; [55]).

196

197 All diversification analyses were performed for each delineation on the consensus  
198 and on the 12 replicate trees to account for phylogenetic uncertainty. We also considered  
199 missing species by imputing sampling fractions, computed as the number of observed VT  
200 or EUs divided by the corresponding BDES estimates of global AMF diversity estimated  
201 from Sichel distributions (Supplementary Table 2). As such analyses depend on diversity  
202 estimates, we replicated all diversification analyses using lower sampling fractions down  
203 to 50%.

204

#### 205 **Testing for potential drivers of AMF diversification:**

206

207 To further investigate the potential factors driving AMF diversification, we assessed  
208 the relationship between lineage-specific estimates of present-day speciation rates and  
209 characteristics of each AMF taxonomic unit, *i.e.* VT or EUs.

210

211 First, we characterized AMF niche width using a set of 10 abiotic and biotic variables  
212 recorded in MaarjAM database for each AMF unit. In short, among a curated dataset  
213 containing AMF sequences occurring only in natural ecosystems (dataset 2; [26]), for each  
214 AMF unit, we reported the number of continents, ecosystems, climatic zones,  
215 biogeographic realms, habitats, and biomes where it was sampled, as well as its number of  
216 plant partners, their phylogenetic diversity, and its centrality in the plant-fungus bipartite  
217 network, and performed a principal component analysis (PCA; Supplementary Methods  
218 5). For AMF units represented by at least 10 sequences, we tested whether these PCA  
219 coordinates reflecting AMF niche widths were correlated with the present-day speciation  
220 rates using both linear mixed-models (not accounting for AMF phylogeny) or

221 MCMCglmm models [56]. For MCMCglmm, we assumed a Gaussian residual distribution,  
222 included the fungal phylogenetic tree as a random effect, and ran the MCMC chains for  
223 1,300,000 iterations with a burn-in of 300,000 and a thinning interval of 500.

224

225         Next, we tested the relationship between speciation rates and geographic  
226 characteristics of AMF units. To test the effect of latitude, we associated each AMF unit  
227 with its set of latitudes and used similar MCMCglmm with an additional random effect  
228 corresponding to the AMF unit. To account for inhomogeneous sampling along the  
229 latitudinal gradient, we re-ran the model on jackknifed datasets (we re-sampled 1,000  
230 interactions per slice of latitude of twenty degrees). Similarly, we tested the effect of  
231 climatic zone and habitat on the speciation rates.

232

233         Finally, to test the effect of dispersal capacity, we assessed the relationship between  
234 spore size and speciation rate for the few ( $n=32$ ) VT that contain sequences of  
235 morphologically characterized AMF isolates [57]. We gathered measures of their average  
236 spore length [57] and tested their relationship with speciation rate by using a phylogenetic  
237 generalized least square regression (PGLS).

238

### 239 **Estimating genetic diversity:**

240

241         As a first attempt at connecting AMF macroevolutionary diversification to  
242 microevolutionary processes, we measured intraspecific genetic diversities across AMF  
243 units. For each AMF unit containing at least 10 sequences, we computed genetic diversity  
244 using Tajima's estimator [58]( $\theta\pi$ ; Supplementary Methods 6). Using similar statistical tests  
245 as above, we investigated the correlation of AMF genetic diversity with speciation rate,  
246 niche width, geographic characteristics, and spore size. We tested the robustness of the  
247 results to the minimal number of sequences per AMF unit (10, 15 or 20) used to compute  
248 genetic diversity and to perform the PCA.

249

250           These statistical models were replicated on the different phylogenetic trees  
251 (consensus or replicates) for each delineation and we reported p-values ( $P$ ) corresponding  
252 to two-sided tests.

253

254 **Results:**

255

256 **AMF species delineations & phylogenetic reconstructions:**

257

258 The EU97.5 and EU98 delineations (obtained using a threshold of 97.5% and 98%  
259 respectively) provided a number of AMF units (340 and 641) comparable to the 384  
260 currently recognized VT, while the EU97 delineation had much less (182). Conversely, the  
261 EU98.5 and EU99 delineations yielded a much larger number of AMF units (1,190 and  
262 2,647, respectively; Supplementary Tables 3 & 4) that was consistent with the number  
263 obtained using GMYC analyses (Supplementary Tables 4 & 5). This supports the idea that  
264 some VT might lump together several cryptic species [16](Supplementary Note 1), and that  
265 a 98.5 or 99% similarity threshold is more relevant for AMF species delineation. In addition,  
266 the GMYC indicated that the actual level of genetic variation within the SSU marker is  
267 overall sufficient to separate AMF species-like units among SSU haplotypes (GMYC LRT:  
268  $P < 0.05$ ; Supplementary Fig. 2); on average, there are 10 SSU haplotypes for one AMF unit  
269 delineated using GMYC (Supplementary Table 5). Rarefaction curves as well as Bayesian  
270 and Chao2 estimates of diversity suggested that more than 90% of the total diversity of  
271 AMF is represented in our dataset regardless of the delineation threshold (Fig. 1b,  
272 Supplementary Tables 2, 5, & 6; Supplementary Note 2), which is consistent with the  
273 proportion of new AMF units detected in recent studies [59].

274

275 The reconstructed Bayesian phylogenetic trees based on VT and EU species  
276 delineations did not yield high support for the nodes separating the main AMF orders; yet,  
277 they had similar topologies and branching times of the internal nodes overall (Fig. 2,  
278 Supplementary Figs. 3). As expected, finer delineations resulted in an increase in the  
279 number of nodes close to the present (Supplementary Figs. 4). However, we observed a  
280 slowdown in the accumulation of new lineages close to the present in all lineage through  
281 time plots (LTTs), including those with the finest delineations (EU98.5 and EU99;  
282 Supplementary Fig. 5).

283

284 **Temporal diversification dynamics:**

285

286 AMF speciation rates ranged from 0.005 to 0.03 events per lineage per Myr (Fig. 2;  
287 Supplementary Fig. 6), and varied both within and among AMF orders, with Glomerales  
288 and Diversisporales having the highest present-day speciation rates (Supplementary Fig.  
289 7). AMF experienced their most rapid diversification between 200 and 100 Myr ago  
290 according to estimates of diversification rates through time obtained with ClaDS (Fig. 2;  
291 Supplementary Fig. 8), and 150-50 Myr ago according to diversification models with  
292 piecewise constant rates (TreePar [48] and CoMET [50], Fig. 2; Supplementary Figs. 9 &  
293 10).

294

295 The fast diversification of AMF around 150 Myr ago was followed by a slowdown  
296 in the recent past (Fig. 2; Supplementary Fig. 8), as suggested by the plateauing of the LTTs.  
297 A global decrease of the speciation rates through time was independently supported by  
298 ClaDS, TreePar, and CoMET analyses (Supplementary Figs. 11, 9 & 10), as well as time-  
299 dependent models in RPANDA [60](Supplementary Fig. 12). This slowdown was robust  
300 to all species delineations (Supplementary Figs. 8, 9, 10, & 12), the branching process prior  
301 (analyses not shown), phylogenetic uncertainty, and sampling fractions down to 50%,  
302 except in ClaDS analyses where the trend disappeared in some EU99 trees and for  
303 sampling fractions lower than 70% (Supplementary Figs. 13, 14, & 15).

304

305 We did not find a strong signal of extinction in our analyses: the turnover rate  
306 estimated from ClaDS was generally close to zero (Supplementary Fig. 11b), and models  
307 including extinctions were never selected in RPANDA (Supplementary Fig. 12). Similarly,  
308 the extinction rates estimated in piecewise-constant models were not significantly different  
309 from 0 (Supplementary Fig. 16).

310

311

312 **AMF diversification drivers:**

313

314 When fitting environment-dependent models of diversification, we found high  
315 support for temperature-dependent models compared to time-dependent models for all  
316 AMF delineations, sampling fractions, and crown ages (Fig. 3; Supplementary Figs. 17, 18,  
317 19, 20, & 21), with the exception of some EU99 trees with a 50% sampling fraction  
318 (Supplementary Fig. 21). This signal of temperature dependency was not due to a temporal  
319 trend (Supplementary Note 3) nor to an artefact caused by rate heterogeneities  
320 (Supplementary Note 4). Evidence for temperature dependency, however, decreased in  
321 some clades closer to the present (see Methods), as small trees tend to be best fit by constant  
322 rather than environment-dependent models (Supplementary Fig. 22). We detected a  
323 significant positive dependency of the diversification rates on CO<sub>2</sub> concentrations in some  
324 sub-trees, but rarely found a significant effect of plant fossil diversity (Supplementary Fig.  
325 22).

326

327 The PCA of AMF niche width characteristics had a first principal component (PC1)  
328 that indicated the propensity of each AMF unit (VT or EUs) to be vastly distributed among  
329 continents, ecosystems and/or associated with many plant species and lineages, whereas  
330 the second principal component (PC2) indicated the propensity of a given AMF unit to  
331 associate with few plant species on many continents (Fig. 4; Supplementary Fig. 23 & 24).  
332 Hence, PC1 reflects AMF niche width, whereas PC2 discriminates the width of the abiotic  
333 relatively to the biotic niche (Fig. 4a-b; Supplementary Fig. 25). We found a positive  
334 correlation between PC1 and lineage-specific speciation rates in the majority of the VT and  
335 EU99 trees (Fig. 4c-d; Supplementary Fig. 26a). However, these results were no longer  
336 significant when controlling for phylogenetic non-independence between AMF units  
337 (Supplementary Fig. 26b), likely because a single *Glomeraceae* clade, including the abundant  
338 and widespread morphospecies *Rhizophagus irregularis* and *R. clarus*, had both the highest  
339 speciation rates among AMF (Fig. 2a-b) and the largest niche widths (Supplementary Fig.  
340 27).

341

342           We found no effect of latitude on speciation rates, regardless of the AMF delineation  
343 or the minimum number of sequences per AMF unit (MCMCglmm:  $P>0.05$ ), and no effect  
344 of habitat or climatic zone either (Supplementary Fig. 28). Similarly, we recovered no  
345 significant correlation between spore size and speciation rate (Supplementary Fig. 29), nor  
346 between spore size and level of endemism (Supplementary Fig. 30).

347

348           Finally, Tajima's  $\theta\pi$  estimator of AMF genetic diversity was significantly and  
349 positively correlated with niche width (PC1) for all AMF delineations and minimal number  
350 of sequences per AMF unit considered, and in particular with abiotic aspects of the niche  
351 (PC2) in many cases (Fig. 4e-h; Supplementary Fig. 26). Genetic diversity was not  
352 correlated with speciation rate (Supplementary Fig. 26), latitude, habitat, climatic zone  
353 (MCMCglmm:  $P>0.05$ ), or spore size (PGLS:  $P>0.05$ ).

354 *Discussion*

355

356 **AMF species delineations, diversity, and phylogeny:**

357

358       The species concept is difficult to apply in AMF, which are poorly differentiated  
359 morphologically and mainly characterized by environmental sequences [16]. In addition,  
360 their reproduction mode is not well known and they have unique nuclear dynamics in  
361 their spores and hyphae [61]. Our GMYC analyses suggest that biologically relevant AMF  
362 species-like units correspond to SSU rRNA haplotypes with a sequence similarity between  
363 98.5 and 99%. With this criterion of species delineation, we estimate that there are between  
364 1,300 and 2,900 AMF ‘species’. These estimates are largely above the number of currently  
365 described morphospecies or VT (Supplementary Note 1) but remain low in comparison  
366 with other fungal groups, like the Agaricomycetes that include taxa forming  
367 ectomycorrhiza [62].

368

369       Species delineations and phylogenies constructed from a single gene and short  
370 sequences are limited, but in the current state of data acquisition, relatively short  
371 metabarcoding sequences provide for most microbial groups, including AMF, the only  
372 current possibility to analyze their diversification dynamics [20, 63, 64]. Here, our  
373 phylogenies did not resolve the branching of the AMF orders, with node supports similar  
374 to those of previous studies [12, 17, 20](Supplementary Note 5), confirming that additional  
375 genomic evidence is required to reach consensus. We considered this uncertainty in the  
376 phylogenetic reconstruction by repeating our analyses on a set of trees spanning the likely  
377 tree space. We hope that our study based on the SSU rRNA region alone will foster efforts  
378 to obtain more genetic data, including additional genes and genomic information, with the  
379 aim of reconstructing better supported, comprehensive phylogenies.

380

381

382



383 **AMF diversify slowly:**

384

385 We found speciation rates for AMF an order of magnitude lower than rates typically  
386 found for macro-eukaryotes [46, 65], like plants [29], or Agaricomycetes [62]. Low  
387 speciation rates in AMF may be linked to their (debated) asexual reproduction [66], to their  
388 occasional long-distance dispersal that homogenizes populations globally over  
389 evolutionary timescales [67], or to the fact that they are generalist obligate symbionts [68].  
390 Regardless of the proximal cause, and contrary to Agaricomycetes for example, which  
391 present a large diversity of species, morphologies, and ecologies, the niche space exploited  
392 by AMF is limited to plant roots and the surrounding soil because of their obligate  
393 dependence on plants for more than 400 Myr [69, 70]. Thus, although AMF species  
394 delineation based on the SSU rRNA gene can be a poor predictor of their functional  
395 diversity, our analyses based on this gene has revealed that AMF, despite their ubiquity,  
396 have poorly diversified in the last 500 Myr compared with other groups.

397

398 We found little evidence for species extinction in AMF, including at mass extinction  
399 events. Although AMF are relatively widespread and generalists, and low extinction rates  
400 have been predicted before based on their ecology [2], these low extinction rate estimates  
401 could also come from the difficulty of estimating extinction from molecular phylogenies  
402 [71], one of the limitations of phylogeny-based diversification analyses (Supplementary  
403 Note 6).

404

405 **AMF diversification through time:**

406

407 The observed peak of AMF diversification detected between 200 and 100 Myr (or 150-  
408 50 Myr according to the models) was mainly linked to the fast diversification of the largest  
409 family Glomeraceae (Fig. 2). This peak was concomitant with the radiation of flowering  
410 plants [28], but also with a major continental reconfiguration, including the breakdown of  
411 Pangea and the formation of climatically contrasted landmasses [20]. This period was also

412 characterized by a warm climate potentially favorable to AMF diversification, such that  
413 disentangling the impact of these various factors on AMF diversification is not  
414 straightforward. Interestingly, a peak of diversification at this period was also found in the  
415 Agaricomycetes forming ectomycorrhiza [62].

416

417 This peak of diversification has been followed by a slowdown. Signals of  
418 diversification slowdowns sometimes result from methodological artifacts, including  
419 incorrect species delineations or under-sampling [72]. We carefully considered uncertainty  
420 in species delineations and under-sampling down to 50%. In addition, our GMYC analyses  
421 confirmed that the SSU rRNA gene evolves fast enough to delineate AMF species-like  
422 units; although some cryptic AMF species can have the same SSU sequence [12], our  
423 analyses support the overall existence of several SSU haplotypes per AMF unit.  
424 Slowdowns in diversification rates close to the present have often been interpreted as a  
425 progressive reduction of the number of available niches as species diversify and  
426 accumulate [72, 73]. In AMF, this potential effect of niche saturation could be exacerbated  
427 by a reduction of their niches linked to both repetitive breakdowns of their symbiosis with  
428 plants and climatic changes. Indeed, in the last 100 Myr, many plant lineages evolved  
429 alternative root symbioses or became non-symbiotic [5, 32, 33, 74]: approximately 20% of  
430 extant plants do not interact with AMF anymore [4]. Additionally, the cooling of the Earth  
431 during the Cenozoic reduced the surface of tropical regions [75, 76], which tend to be a  
432 reservoir of ecological niches for AMF [20, 32, 77].

433

434 The difficulty of reconstructing past symbiotic associations prevents direct testing of  
435 the hypothesis that the emergence of new root symbioses in plants led to a diversification  
436 slowdown in AMF. However, we tested the hypothesis that global temperature changes  
437 affected diversification rates and found a strong relationship (Fig. 3). Such associations  
438 between temperature and diversification rates have been observed before in eukaryotes  
439 and have several potential causes [78]. Two prevailing hypotheses are the evolutionary  
440 speed hypothesis, stipulating that high temperatures entail higher mutation rates and

441 faster speciation [79], and the productivity hypothesis, stating that resources and  
442 associated ecological niches are more numerous in warm and productive environments,  
443 especially when the tropics are large [80]. The latter hypothesis is particularly relevant for  
444 AMF, which have many host plant niches in the tropics and potentially less in temperate  
445 regions [81], where a higher proportion of plants are non-mycorrhizal [82] or  
446 ectomycorrhizal [32, 62]. Hence, the observed effect of past global temperatures could  
447 reflect the shrinkage of tropical areas and the associated decrease of the relative proportion  
448 of arbuscular mycorrhizal plants.

449

450 A few AMF clades displayed a significant support for diversification models with a  
451 positive dependency on CO<sub>2</sub> concentrations, which reinforces the idea that for the  
452 corresponding AMF, benefits retrieved from plants could have been amplified by high CO<sub>2</sub>  
453 concentrations and fostered diversification [83, 84]. Conversely, we found a limited effect  
454 of land plant fossil diversity, which indicates that variations in the tempo of AMF  
455 diversification did not systematically follow those of land plants. Still, the possible  
456 concordance of the peak of AMF diversification with the radiation of the Angiosperms is  
457 noteworthy, in particular in Glomeraceae that frequently interact with present-day  
458 Angiosperms [17]. The co-diversification with the plants might have been an important  
459 driver from the emergence of land plants until the Mesozoic [2, 10], but less so thereafter,  
460 when AMF diversification declined while some flowering plants radiated, including AMF-  
461 free groups such as the species-rich Orchidaceae, blurring co-diversification patterns  
462 (Supplementary Fig. 31)[30, 85].

463

#### 464 **AMF recent diversification:**

465

466 Looking at the correlates of AMF present-day diversification rates, we found no effect  
467 of habitat or climatic zone, even though AMF are more frequent and diverse in the tropics  
468 (Supplementary Fig. 32)[20, 25, 81] and their speciation rates are positively correlated with  
469 global temperature. Further work, including a more thorough sampling of the distribution

470 of AMF species across latitudes and habitats, would be required to confirm these patterns  
471 and to distinguish whether speciation events are indeed no more frequent in the tropics or,  
472 if they are, whether long-distance dispersal redistributes the new lineages at different  
473 latitudes over evolutionary time scales [25]. Similarly, although the temporal changes in  
474 the availability of AMF niches likely influenced the diversification of the group, we found  
475 little support for AMF species with larger niche width having higher lineage-specific  
476 speciation rates (Fig. 4). We also note that there are important aspects of the niche that we  
477 do not (and yet cannot) account for in our characterization of AMF niche width: it is  
478 thought that some AMF species may mainly provide mineral nutrients extracted from the  
479 soil, whereas others may be more specialized in protecting plants from biotic or abiotic  
480 stresses [86] and such (inter- or intra-specific) functional variations may have evolutionary  
481 significance. Finally, although spore size is often inversely related to dispersal capacity  
482 [87], which can either promote diversification by favoring founder speciation events, or  
483 limit diversification by increasing gene flow, we found no significant correlation between  
484 spore size and diversification rates, which may be explained either by a weak or absent  
485 effect or by the low number of species for which this data is available. In addition, the  
486 absence of correlation between spore size and level of endemism suggests that even AMF  
487 with large spores experience long-distance dispersal [57, 88]. Thus, if large spores might  
488 limit dispersal at smaller (e.g. intra-continental) scales in AMF [22, 89], this does not seem  
489 to affect diversification.

490

491 In AMF, intraspecific variability is an important source of functional diversity [67,  
492 90] and their genetic diversity may indicate the intraspecific variability on which selection  
493 can act, potentially leading to species diversification. Here, geographically widespread  
494 AMF species appear to be more genetically diverse, as previously suggested by population  
495 genomics [67], but do not necessarily speciate faster. Along with a decoupling between  
496 genetic diversity and lineage-specific speciation rate, this suggests that the accumulation  
497 of genetic diversity among distant subpopulations is not enough to spur AMF speciation.

498

499 **Conclusion:**

500

501 Our findings that AMF have low speciation rates, likely constrained by the  
502 availability of suitable niches, reinforce the vision of AMF as an “evolutionary cul-de-sac”  
503 [1]. We interpret the significant diversification slowdown in the past 100 Myr as the  
504 conjunction of the emergence of plant lineages not associated with AMF and the reduction  
505 of tropical areas induced by climate cooling, in the context of obligate dependence of AMF  
506 on plants. Diversification slowdowns have often been interpreted as the signal of adaptive  
507 radiations [72, 91], that is clades that experienced a rapid accumulation of morphological,  
508 ecological, and species diversity [92]. AMF provide a striking example of a clade with slow  
509 morphological, ecological and species diversification that features a pattern of  
510 diversification slowdown. In AMF, and potentially in many other species groups [78], such  
511 a slowdown likely reflects a reduction of the global availability of ecological niches.

512 **References:**

513

- 514 1. Malloch DM. The evolution of mycorrhizae. *Can J Plant Path* 1987; **9**: 398–402.
- 515 2. Morton JB. Species and clones of arbuscular mycorrhizal fungi (Glomales,  
516 Zygomycetes): their role in macro- and microevolutionary processes. *Mycotaxon*  
517 (USA) 1990; **37**: 493–515.
- 518 3. Smith SE, Read DJ. Mycorrhizal Symbiosis. *Mycorrhizal Symbiosis* . 2008. Elsevier.
- 519 4. van der Heijden MGAA, Martin FM, Selosse M-A, Sanders IR. Mycorrhizal ecology  
520 and evolution: the past, the present, and the future. *New Phytol* 2015; **205**: 1406–  
521 1423.
- 522 5. Selosse M-A, Le Tacon F. The land flora: a phototroph-fungus partnership? *Trends*  
523 *Ecol Evol* 1998; **13**: 15–20.
- 524 6. Field KJ, Pressel S, Duckett JG, Rimington WR, Bidartondo MI. Symbiotic options  
525 for the conquest of land. *Trends Ecol Evol* 2015; **30**: 477–486.
- 526 7. Feijen FAA, Vos RA, Nuytinck J, Merckx VSFT. Evolutionary dynamics of  
527 mycorrhizal symbiosis in land plant diversification. *Sci Rep* 2018; **8**: 10698.
- 528 8. Strullu-Derrien C, Selosse MA, Kenrick P, Martin FM. The origin and evolution of  
529 mycorrhizal symbioses: from palaeomycology to phylogenomics. *New Phytol* 2018;  
530 **220**: 1012–1030.
- 531 9. Simon L, Bousquet J, Lévesque RC, Lalonde M. Origin and diversification of  
532 endomycorrhizal fungi and coincidence with vascular land plants. *Nature* 1993; **363**:  
533 67–69.
- 534 10. Lutzoni F, Nowak MD, Alfaro ME, Reeb V, Miadlikowska J, Krug M, et al.  
535 Contemporaneous radiations of fungi and plants linked to symbiosis. *Nat Commun*  
536 2018; **9**: 1–11.
- 537 11. Stürmer SL. A history of the taxonomy and systematics of arbuscular mycorrhizal  
538 fungi belonging to the phylum Glomeromycota. *Mycorrhiza* 2012; **22**: 247–258.
- 539 12. Krüger M, Krüger C, Walker C, Stockinger H, Schüßler A. Phylogenetic reference  
540 data for systematics and phylotaxonomy of arbuscular mycorrhizal fungi from

- 541 phylum to species level. *New Phytol* 2012; **193**: 970–984.
- 542 13. Öpik M, Vanatoa A, Vanatoa E, Moora M, Davison J, Kalwij JM, et al. The online  
543 database MaarjAM reveals global and ecosystemic distribution patterns in  
544 arbuscular mycorrhizal fungi (Glomeromycota). *New Phytol* 2010; **188**: 223–241.
- 545 14. Öpik M, Davison J, Moora M, Zobel M. DNA-based detection and identification of  
546 Glomeromycota: the virtual taxonomy of environmental sequences. *Botany* 2014; **92**:  
547 135–147.
- 548 15. Powell JR, Monaghan MT, Öpik M, Rillig MC. Evolutionary criteria outperform  
549 operational approaches in producing ecologically relevant fungal species  
550 inventories. *Mol Ecol* 2011; **20**: 655–666.
- 551 16. Bruns TD, Corradi N, Redecker D, Taylor JW, Öpik M. Glomeromycotina: what is a  
552 species and why should we care? *New Phytol* 2018; **220**: 963–967.
- 553 17. Rimington WR, Pressel S, Duckett JG, Field KJ, Read DJ, Bidartondo MI. Ancient  
554 plants with ancient fungi: liverworts associate with early-diverging arbuscular  
555 mycorrhizal fungi. *Proc R Soc B Biol Sci* 2018; **285**: 20181600.
- 556 18. James TY, Kauff F, Schoch CL, Matheny PB, Hofstetter V, Cox CJ, et al.  
557 Reconstructing the early evolution of Fungi using a six-gene phylogeny. *Nature*  
558 2006; **443**: 818–822.
- 559 19. Venice F, Ghignone S, Salvioli di Fossalunga A, Amselem J, Novero M, Xianan X, et  
560 al. At the nexus of three kingdoms: the genome of the mycorrhizal fungus  
561 *Gigaspora margarita* provides insights into plant, endobacterial and fungal  
562 interactions. *Environ Microbiol* 2020; **22**: 122–141.
- 563 20. Davison J, Moora M, Opik M, Adholeya A, Ainsaar L, Ba A, et al. Global  
564 assessment of arbuscular mycorrhizal fungus diversity reveals very low endemism.  
565 *Science (80- )* 2015; **349**: 970–973.
- 566 21. Egan C, Li D-W, Klironomos J. Detection of arbuscular mycorrhizal fungal spores  
567 in the air across different biomes and ecoregions. *Fungal Ecol* 2014; **12**: 26–31.
- 568 22. Bueno CG, Moora M. How do arbuscular mycorrhizal fungi travel? *New Phytol*  
569 2019; **222**: 645–647.



- 570 23. Correia M, Heleno R, da Silva LP, Costa JM, Rodríguez-Echeverría S. First evidence  
571 for the joint dispersal of mycorrhizal fungi and plant diaspores by birds. *New Phytol*  
572 2019; **222**: 1054–1060.
- 573 24. Templeton AR. The reality and importance of founder speciation in evolution.  
574 *BioEssays* . 2008. John Wiley & Sons, Ltd. , **30**: 470–479
- 575 25. Pärtel M, Öpik M, Moora M, Tedersoo L, Szava-Kovats R, Rosendahl S, et al.  
576 Historical biome distribution and recent human disturbance shape the diversity of  
577 arbuscular mycorrhizal fungi. *New Phytol* 2017; **216**: 227–238.
- 578 26. Perez-Lamarque B, Selosse M, Öpik M, Morlon H, Martos F. Cheating in arbuscular  
579 mycorrhizal mutualism: a network and phylogenetic analysis of  
580 mycoheterotrophy. *New Phytol* 2020; **226**: 1822–1835.
- 581 27. Sanders IR. Preference, specificity and cheating in the arbuscular mycorrhizal  
582 symbiosis. *Trends Plant Sci* 2003; **8**: 143–145.
- 583 28. Sauquet H, Magallón S. Key questions and challenges in angiosperm  
584 macroevolution. *New Phytol* 2018; **219**: 1170–1187.
- 585 29. Zanne AE, Tank DC, Cornwell WK, Eastman JM, Smith SA, FitzJohn RG, et al.  
586 Three keys to the radiation of angiosperms into freezing environments. *Nature*  
587 2014; **506**: 89–92.
- 588 30. Cleal CJ, Cascales-Miñana B. Composition and dynamics of the great Phanerozoic  
589 Evolutionary Floras. *Lethaia* 2014; **47**: 469–484.
- 590 31. Bredenkamp GJ, Spada F, Kazmierczak E. On the origin of northern and southern  
591 hemisphere grasslands. *Plant Ecol* 2002; **163**: 209–229.
- 592 32. Brundrett MC, Tedersoo L. Evolutionary history of mycorrhizal symbioses and  
593 global host plant diversity. *New Phytol* 2018; **220**: 1108–1115.
- 594 33. Werner GDA, Cornelissen JHC, Cornwell WK, Soudzilovskaia NA, Kattge J, West  
595 SA, et al. Symbiont switching and alternative resource acquisition strategies drive  
596 mutualism breakdown. *Proc Natl Acad Sci* 2018; **115**: 5229–5234.
- 597 34. Werner GDA, Cornwell WK, Sprent JI, Kattge J, Kiers ET. A single evolutionary  
598 innovation drives the deep evolution of symbiotic N<sub>2</sub>-fixation in angiosperms. *Nat*



- 599            *Commun* 2014; **5**: 4087.
- 600 35. Lekberg Y, Vasar M, Bullington LS, Sepp S-K, Antunes PM, Bunn R, et al. More  
601 bang for the buck? Can arbuscular mycorrhizal fungal communities be  
602 characterized adequately alongside other fungi using general fungal primers? *New*  
603 *Phytol* 2018; **220**: 971–976.
- 604 36. Katoh K, Standley DM. MAFFT Multiple sequence alignment software version 7:  
605 Improvements in performance and usability. *Mol Biol Evol* 2013; **30**: 772–780.
- 606 37. Bouckaert R, Heled J, Kühnert D, Vaughan T, Wu C-H, Xie D, et al. BEAST 2: a  
607 software platform for Bayesian evolutionary analysis. *PLoS Comput Biol* 2014; **10**:  
608 e1003537.
- 609 38. Simon L, Lalonde M, Bruns TD. Specific amplification of 18S fungal ribosomal  
610 genes from vesicular-arbuscular endomycorrhizal fungi colonizing roots. *Appl*  
611 *Environ Microbiol* 1992; **58**: 291–5.
- 612 39. Lee J, Lee S, Young JPW. Improved PCR primers for the detection and  
613 identification of arbuscular mycorrhizal fungi. *FEMS Microbiol Ecol* 2008; **65**: 339–  
614 349.
- 615 40. Morlon H, Lewitus E, Condamine FL, Manceau M, Clavel J, Drury J. RPANDA: An  
616 R package for macroevolutionary analyses on phylogenetic trees. *Methods Ecol Evol*  
617 2016; **7**: 589–597.
- 618 41. R Core Team. R: A language and environment for statistical computing. 2019. R  
619 Foundation for Statistical Computing, Vienna, Austria.
- 620 42. Fujisawa T, Barraclough TG. Delimiting species using single-locus data and the  
621 generalized mixed yule coalescent approach: A revised method and evaluation on  
622 simulated data sets. *Syst Biol* 2013; **62**: 707–724.
- 623 43. Pons J, Barraclough TG, Gomez-Zurita J, Cardoso A, Duran DP, Hazell S, et al.  
624 Sequence-based species delimitation for the DNA taxonomy of undescribed insects.  
625 *Syst Biol* 2006; **55**: 595–609.
- 626 44. Ezard T, Fujisawa T, Barraclough TG. SPLITS: SPecies' Limits by Threshold  
627 Statistics. 2009. , R package

- 628 45. Quince C, Curtis TP, Sloan WT. The rational exploration of microbial diversity.  
629 *ISME J* 2008; **2**: 997–1006.
- 630 46. Maliet O, Hartig F, Morlon H. A model with many small shifts for estimating  
631 species-specific diversification rates. *Nat Ecol Evol* 2019; **3**: 1086–1092.
- 632 47. Gelman A, Rubin DB. Inference from iterative simulation using multiple sequences.  
633 *Stat Sci* 1992; **7**: 457–472.
- 634 48. Stadler T. Mammalian phylogeny reveals recent diversification rate shifts. *Proc Natl  
635 Acad Sci* 2011; **108**: 6187–6192.
- 636 49. Höhna S, May MR, Moore BR. TESS: An R package for efficiently simulating  
637 phylogenetic trees and performing Bayesian inference of lineage diversification  
638 rates. *Bioinformatics* 2016; **32**: 789–791.
- 639 50. May MR, Höhna S, Moore BR. A Bayesian approach for detecting the impact of  
640 mass-extinction events on molecular phylogenies when rates of lineage  
641 diversification may vary. *Methods Ecol Evol* 2016; **7**: 947–959.
- 642 51. Condamine FL, Rolland J, Morlon H. Macroevolutionary perspectives to  
643 environmental change. *Ecol Lett* 2013; **16**: 72–85.
- 644 52. Rabosky DL, Lovette IJ. Density-dependent diversification in North American  
645 wood warblers. *Proc R Soc B Biol Sci* 2008; **275**: 2363–2371.
- 646 53. Royer DL, Berner RA, Montanez IP, Tabor NJ, Beerling DJ. CO<sub>2</sub> as a primary driver  
647 of Phanerozoic climate. *GSA Today* 2004; **14**: 4–10.
- 648 54. Foster GL, Royer DL, Lunt DJ. Future climate forcing potentially without precedent  
649 in the last 420 million years. *Nat Commun* 2017; **8**: 14845.
- 650 55. Alroy J. Geographical, environmental and intrinsic biotic controls on Phanerozoic  
651 marine diversification. *Palaeontology* 2010; **53**: 1211–1235.
- 652 56. Hadfield JD. MCMC methods for multi-response generalized linear mixed models:  
653 The MCMCglmm R package. *J Stat Softw* 2010; **33**: 1–22.
- 654 57. Davison J, Moora M, Öpik M, Ainsaar L, Ducousso M, Hiiesalu I, et al. Microbial  
655 island biogeography: isolation shapes the life history characteristics but not  
656 diversity of root-symbiotic fungal communities. *ISME J* 2018; **12**: 2211–2224.

- 657 58. Tajima F. Evolutionary relationship of DNA sequences in finite populations.  
658 *Genetics* 1983; **105**: 437–460.
- 659 59. Sepp S, Davison J, Jairus T, Vasar M, Moora M, Zobel M, et al. Non-random  
660 association patterns in a plant–mycorrhizal fungal network reveal host–symbiont  
661 specificity. *Mol Ecol* 2019; **28**: 365–378.
- 662 60. Morlon H, Parsons TL, Plotkin JB. Reconciling molecular phylogenies with the  
663 fossil record. *Proc Natl Acad Sci* 2011; **108**: 16327–16332.
- 664 61. Kokkoris V, Stefani F, Dalpé Y, Dettman J, Corradi N. Nuclear dynamics in the  
665 arbuscular mycorrhizal fungi. *Trends Plant Sci* 2020; **25**: 765–778.
- 666 62. Varga T, Krizsán K, Földi C, Dima B, Sánchez-García M, Sánchez-Ramírez S, et al.  
667 Megaphylogeny resolves global patterns of mushroom evolution. *Nat Ecol Evol*  
668 2019; **3**: 668–678.
- 669 63. Louca S, Shih PM, Pennell MW, Fischer WW, Parfrey LW, Doebeli M. Bacterial  
670 diversification through geological time. *Nat Ecol Evol* 2018; **2**: 1458–1467.
- 671 64. Lewitus E, Bittner L, Malviya S, Bowler C, Morlon H. Clade-specific diversification  
672 dynamics of marine diatoms since the Jurassic. *Nat Ecol Evol* 2018; **2**: 1715–1723.
- 673 65. Upham NS, Esselstyn JA, Jetz W. Inferring the mammal tree: Species-level sets of  
674 phylogenies for questions in ecology, evolution, and conservation. *PLoS Biol* 2019;  
675 **17**: e3000494.
- 676 66. Yildirim G, Malar C M, Kokkoris V, Corradi N. Parasexual and sexual reproduction  
677 in arbuscular mycorrhizal fungi: Room for both. *Trends Microbiol* 2020; **28**: 517–519.
- 678 67. Savary R, Masclaux FG, Wyss T, Droh G, Cruz Corella J, Machado AP, et al. A  
679 population genomics approach shows widespread geographical distribution of  
680 cryptic genomic forms of the symbiotic fungus *Rhizophagus irregularis*. *ISME J*  
681 2018; **12**: 17–30.
- 682 68. Morlon H, Kems BD, Plotkin JB, Brisson D. Explosive radiation of a bacterial  
683 species group. *Evolution (N Y)* 2012; **66**: 2577–2586.
- 684 69. Tisserant E, Malbreil M, Kuo A, Kohler A, Symeonidi A, Balestrini R, et al. Genome  
685 of an arbuscular mycorrhizal fungus provides insight into the oldest plant

- 686 symbiosis. *Proc Natl Acad Sci U S A* 2013; **110**: 20117–22.
- 687 70. Rich MK, Nouri E, Courty P-E, Reinhardt D. Diet of arbuscular mycorrhizal fungi:  
688 Bread and butter? *Trends Plant Sci* 2017; **22**: 652–660.
- 689 71. Rabosky DL. Challenges in the estimation of extinction from molecular  
690 phylogenies: A response to Beaulieu and O’Meara. *Evolution (N Y)* 2016; **70**: 218–  
691 228.
- 692 72. Moen D, Morlon H. Why does diversification slow down? *Trends Ecol Evol* 2014; **29**:  
693 190–197.
- 694 73. Rabosky DL. Ecological limits and diversification rate: Alternative paradigms to  
695 explain the variation in species richness among clades and regions. *Ecol Lett* 2009;  
696 **12**: 735–743.
- 697 74. Maherali H, Oberle B, Stevens PF, Cornwell WK, McGlinn DJ. Mutualism  
698 persistence and abandonment during the evolution of the mycorrhizal symbiosis.  
699 *Am Nat* 2016; **188**: E113–E125.
- 700 75. S. Meseguer A, Condamine FL. Ancient tropical extinctions at high latitudes  
701 contributed to the latitudinal diversity gradient. *Evolution (N Y)* 2020; **74**: 1966–  
702 1987.
- 703 76. Ziegler AM, Eshel G, McAllister Rees P, Rothfus TA, Rowley DB, Sunderlin D.  
704 Tracing the tropics across land and sea: Permian to present. *Lethaia* 2003; **36**: 227–  
705 254.
- 706 77. Read DJ. Mycorrhizas in ecosystems. *Experientia* 1991; **47**: 376–391.
- 707 78. Condamine FL, Rolland J, Morlon H. Assessing the causes of diversification  
708 slowdowns: temperature-dependent and diversity-dependent models receive  
709 equivalent support. *Ecol Lett* 2019; **22**: 1900–1912.
- 710 79. Rohde K. Latitudinal gradients in species diversity: The search for the primary  
711 cause. *Oikos* 1992; **65**: 514.
- 712 80. Clarke A, Gaston KJ. Climate, energy and diversity. *Proc R Soc B Biol Sci* . 2006. The  
713 Royal Society London. , **273**: 2257–2266
- 714 81. Toussaint A, Bueno G, Davison J, Moora M, Tedersoo L, Zobel M, et al.

- 715 Asymmetric patterns of global diversity among plants and mycorrhizal fungi. *J Veg*  
716 *Sci* 2020; **31**: 355–366.
- 717 82. Bueno CG, Moora M, Gerz M, Davison J, Öpik M, Pärtel M, et al. Plant mycorrhizal  
718 status, but not type, shifts with latitude and elevation in Europe. *Glob Ecol Biogeogr*  
719 2017; **26**: 690–699.
- 720 83. Field KJ, Rimington WR, Bidartondo MI, Allinson KE, Beerling DJ, Cameron DD, et  
721 al. Functional analysis of liverworts in dual symbiosis with Glomeromycota and  
722 Mucoromycotina fungi under a simulated Palaeozoic CO<sub>2</sub> decline. *ISME J* 2016; **10**:  
723 1514–1526.
- 724 84. Humphreys CP, Franks PJ, Rees M, Bidartondo MI, Leake JR, Beerling DJ.  
725 Mutualistic mycorrhiza-like symbiosis in the most ancient group of land plants. *Nat*  
726 *Commun* 2010; **1**: 103.
- 727 85. Ramírez-Barahona S, Sauquet H, Magallón S. The delayed and geographically  
728 heterogeneous diversification of flowering plant families. *Nat Ecol Evol* 2020; **4**:  
729 1232–1238.
- 730 86. Chagnon P-L, Bradley RL, Maherali H, Klironomos JN. A trait-based framework to  
731 understand life history of mycorrhizal fungi. *Trends Plant Sci* 2013; **18**: 484–491.
- 732 87. Nathan R, Schurr FM, Spiegel O, Steinitz O, Trakhtenbrot A, Tsoar A. Mechanisms  
733 of long-distance seed dispersal. *Trends Ecol Evol* 2008; **23**: 638–647.
- 734 88. Kivlin SN. Global mycorrhizal fungal range sizes vary within and among  
735 mycorrhizal guilds but are not correlated with dispersal traits. *J Biogeogr* 2020; **47**:  
736 1994–2001.
- 737 89. Chaudhary VB, Nolimal S, Sosa-Hernández MA, Egan C, Kastens J. Trait-based  
738 aerial dispersal of arbuscular mycorrhizal fungi. *New Phytol* 2020; **228**: 238–252.
- 739 90. Munkvold L, Kjøller R, Vestberg M, Rosendahl S, Jakobsen I. High functional  
740 diversity within species of arbuscular mycorrhizal fungi. *New Phytol* 2004; **164**: 357–  
741 364.
- 742 91. Harmon LJ, Schulte JA, Larson A, Losos JB. Tempo and mode of evolutionary  
743 radiation in iguanian lizards. *Science (80- )* 2003; **301**: 961–964.

- 744 92. Simpson GG. The major features of evolution. 1953. Columbia University Press,  
745 New York.
- 746 93. Janzen T, Etienne RS. Inferring the role of habitat dynamics in driving  
747 diversification: evidence for a species pump in Lake Tanganyika cichlids. *bioRxiv*  
748 2016; **11**: 1–18.
- 749

750 **Acknowledgment:**

751

752 The authors acknowledge C. Strullu-Derrien, M. Elias, D. de Vienne, A. Vogler, J.-Y.  
753 Dubuisson, C. Quince, S.-K. Sepp, and M. Chase for helpful discussions. They also thank  
754 L. Aristide, S. Lambert, J. Clavel, I. Quintero, I. Overcast, and G. Sommeria for comments  
755 on an early version of the manuscript and David Marsh for English editing. BPL  
756 acknowledges B. Robira, F. Foutel-Rodier, F. Duchenne, E. Faure, E. Kerdoncuff, R. Petrolli,  
757 and G. Collobert for useful discussions and C. Fruciano and E. Lewitus for providing  
758 codes. This work was supported by a doctoral fellowship from the École Normale  
759 Supérieure de Paris attributed to BPL and the École Doctorale FIRE – Programme  
760 Bettencourt. MÖ was supported by the European Regional Development Fund (Centre of  
761 Excellence EcolChange) and University of Tartu (PLTOM20903). Funding of the research  
762 of FM was from the Agence Nationale de la Recherche (ANR-19-CE02-0002). HM  
763 acknowledges support from the European Research Council (grant CoG-PANDA).

764

765 **Author contributions:**

766

767 All the authors designed the study. MÖ gathered the data and BPL performed the analyses.  
768 OM and ACAS provided some codes. BPL and HM wrote the first version of the  
769 manuscript and all authors contributed substantially to the revisions.

770

771 **Competing Interests statement:**

772

773 The authors declare that there is no conflict of interest.

## 774 Figures

775

776

777 **Figure 1: Molecular-based species delineations of arbuscular mycorrhizal fungi (AMF)**  
778 **give consistent results and indicate a nearly complete sampling.**

779 We compared the *virtual taxa* (VT) delineation from [13] with newly-developed automatic  
780 delineations into *evolutionary units* (EUs) based on an average threshold of similarity and a  
781 criterion of monophyly.

782 (a) The proportion of AMF units (VT or EUs) in each AMF family reveals constant  
783 proportions across delineations, although Glomeraceae tend to be relatively less numerous  
784 compared to the other AMF family in the VT delineation. The main AMF orders are  
785 indicated on the right of the charts: Paraglomerales + Archaeosporales, Diversisporales,  
786 and Glomerales (Glomeraceae + Claroideoglomeraceae).

787 (b) Rarefaction curves indicating the number of AMF units as a function of the percentage  
788 of sampled AMF accession revealed that the AMF sampling in MaarjAM is close to  
789 saturation for all delineations (VT or EUs). Rarefactions were performed 100 times every 5  
790 percent and the median of the 100 replicates is represented here.

791

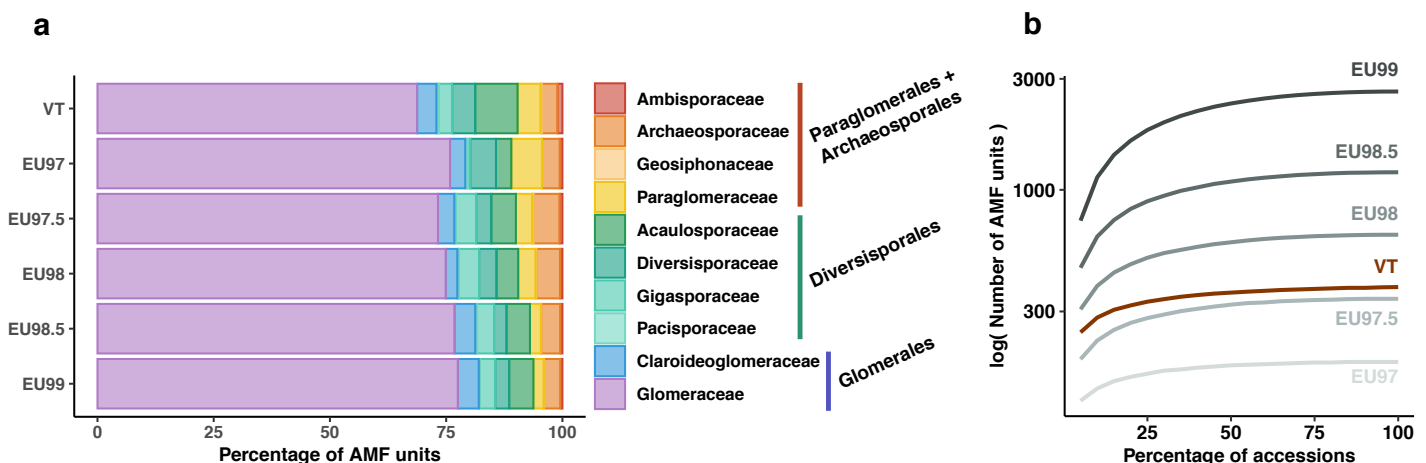



792 **Figure 2: The diversification dynamic of arbuscular mycorrhizal fungi (AMF) varies**  
793 **significantly through time and between lineages.**

794

795 **(a-b):** AMF consensus phylogenetic trees corresponding to the VT (a) and EU99 (b) species  
796 delineations. Branches are colored according to the lineage-specific speciation rates  
797 estimated by ClaDS using the BDES estimated sampling fraction: lineages with low and  
798 high speciation rates are represented in blue and red, respectively.

799 The main AMF clades are indicated with the following letters: *P* = Paraglomerales +  
800 Archaeosporales, *D* = Diversisporales, *C* = Claroideoglomeraceae, and *G* = Glomeraceae.

801

802 **(c-d):** Mean speciation rates through time estimated by ClaDS, for the VT (c) and EU99 (d)  
803 delineations and using the BDES estimated sampling fraction. The mean speciation rate  
804 corresponds to the maximum *a posteriori* (MAP) of the mean speciation rate across all  
805 fungal lineages back in time (including extinct and unsampled lineages). Orange and grey  
806 lines represent the 12 independent replicate trees and the consensus tree, respectively.  
807 Unlike most replicate trees, the EU99 consensus tree tends to present a limited  
808 diversification slowdown, which reinforces the idea that consensus trees can be a  
809 misleading representation [93].

810

811 **(e-f):** Net diversification rates (speciation rates minus extinction rates) through time  
812 estimated by TreePar, for the VT (c) and EU99 (d) delineations and using the BDES  
813 estimated sampling fraction. Orange and grey lines represent the 12 independent replicate  
814 trees and the consensus tree, respectively.

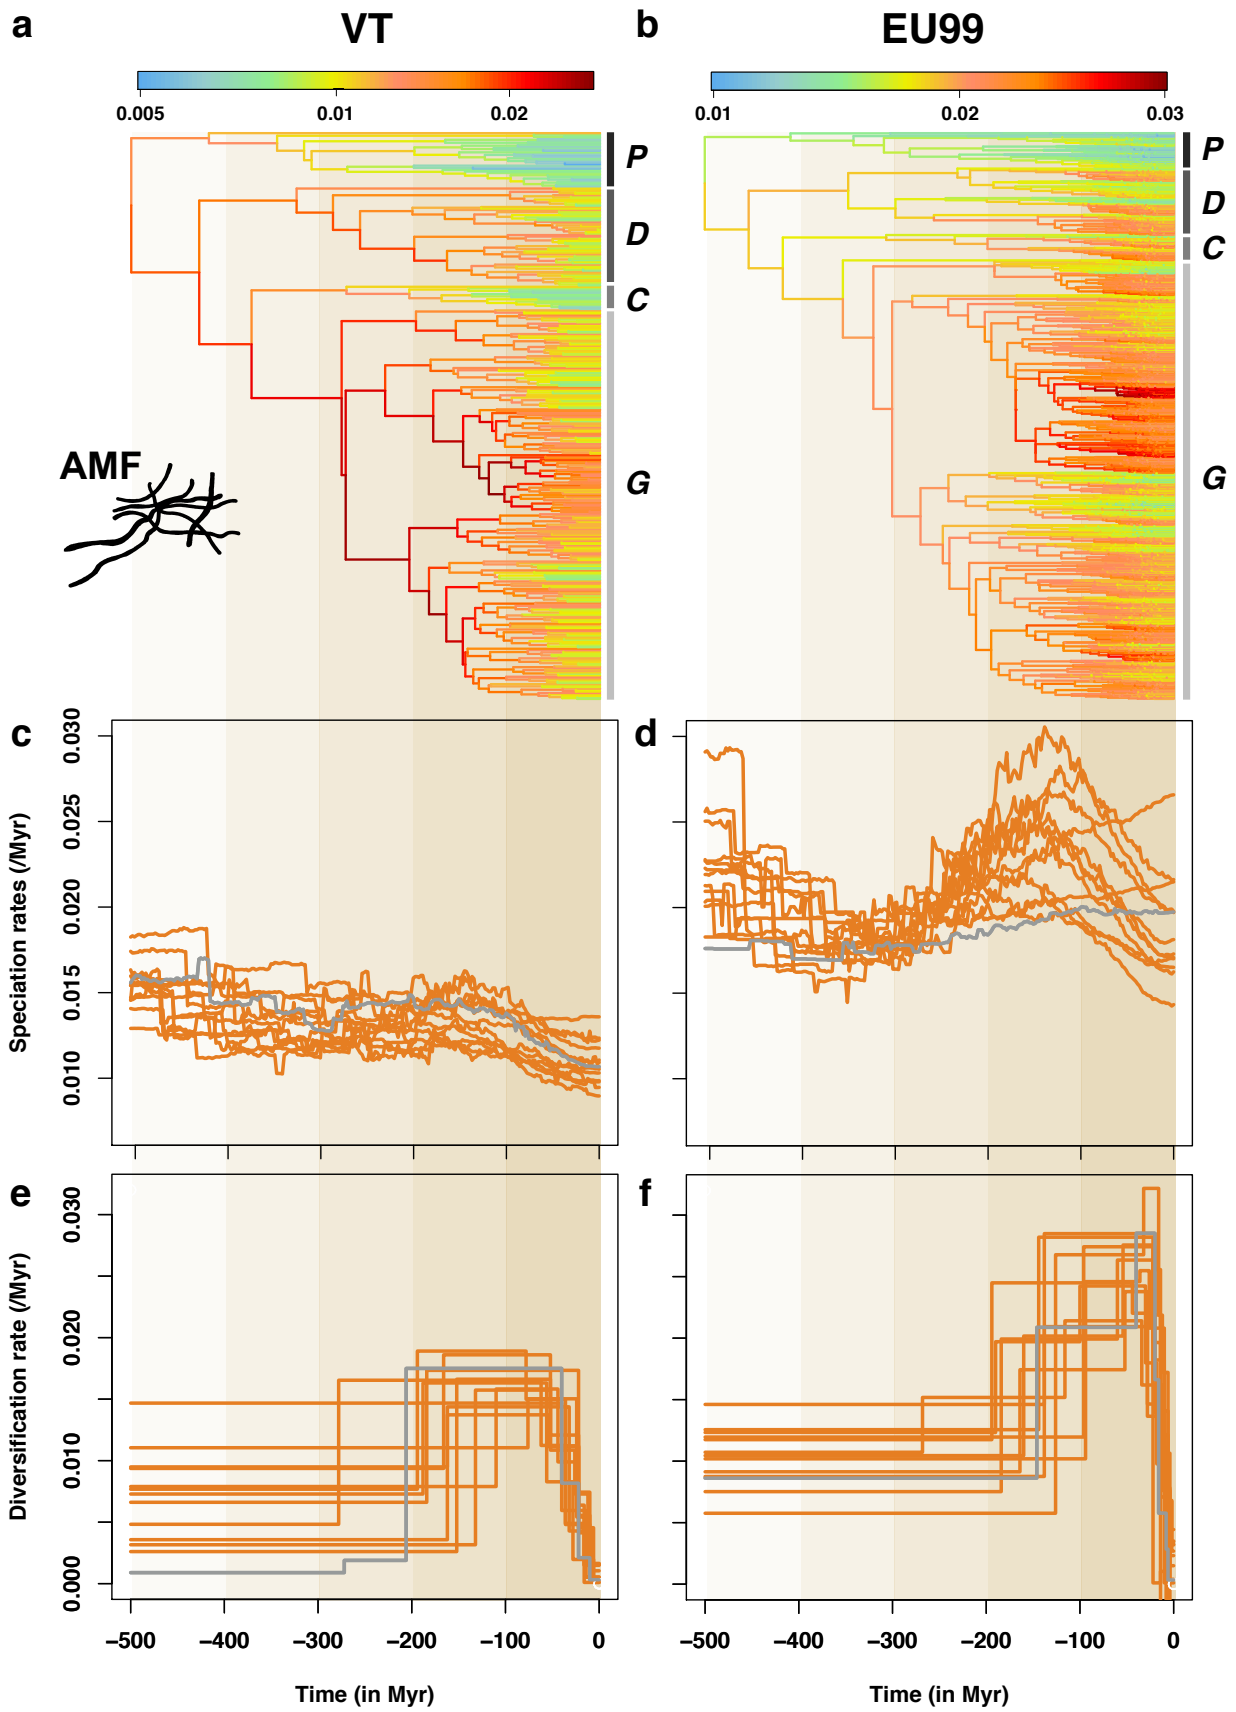

816 **Figure 3: Temperature-dependent diversification models reveal that global temperature**  
817 **positively associates with the speciation rates of arbuscular mycorrhizal fungi (AMF) in**  
818 **the last 500 million years.**

819

820 **(a):** Average global temperature in the last 500 million years (Myr) relative to the average  
821 temperature of the period 1960-1990. The smoothed orange line represents cubic splines  
822 with 33 degrees of freedom used to fit temperature-dependent models of AMF  
823 diversification with RPANDA. This default smoothing was estimated using the R function  
824 *smooth.spline*.

825

826 **(b):** AICc difference between the best-supported time-dependent model and the  
827 temperature-dependent model in RPANDA, for the VT (left) and EU99 (right) delineations,  
828 using the BDES estimated sampling fraction. An AICc difference greater than 2 indicates  
829 that there is significant support for the temperature-dependent model.

830

831 **(c):** Parameter estimations of the temperature-dependent models (speciation rate  $\sim$   
832  $\exp(\text{parameter} * \text{temperature})$ ). A positive parameter value indicates a positive effect of  
833 temperature on speciation rates.

834

835 For both delineations, the boxplots represent the results obtained for the consensus tree  
836 and the 12 independent replicate trees. Boxplots indicate the median surrounded by the  
837 first and third quartiles, and whiskers extend to the extreme values but no further than 1.5  
838 of the inter-quartile range. The horizontal dotted lines highlighted the values estimated for  
839 the consensus trees. Compared to the replicate trees, the consensus trees tend to present  
840 extreme values (stronger support for temperature-dependent model), which reinforces the  
841 idea that consensus trees can be a misleading representation [93].

842

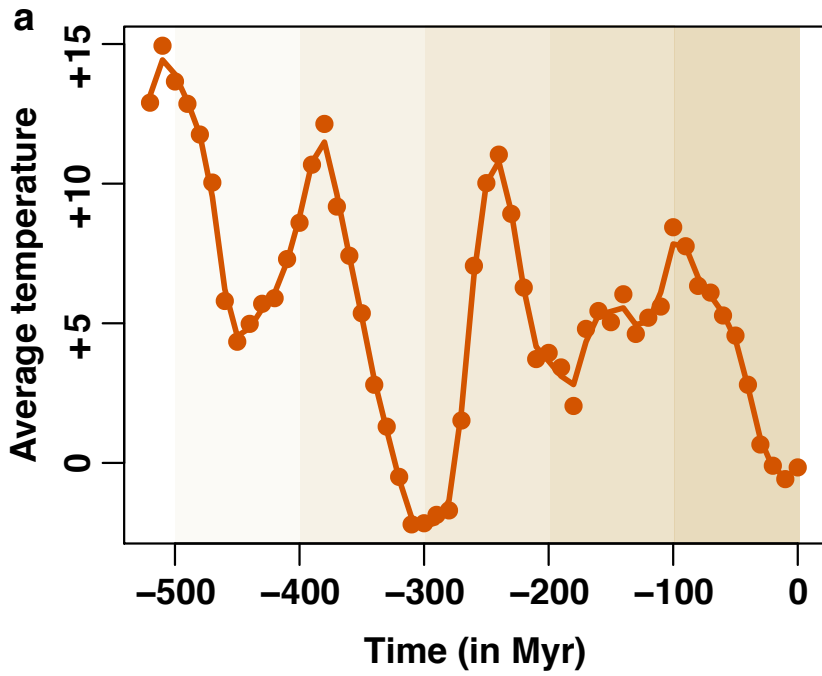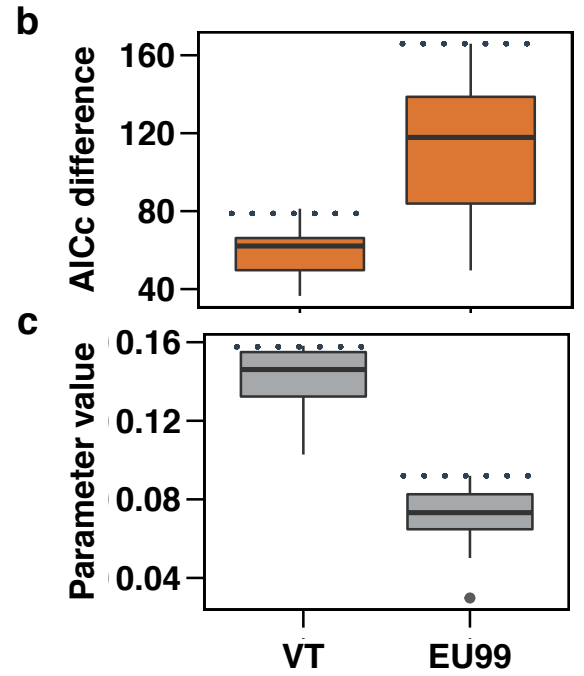

843 **Figure 4: Abiotic and biotic drivers of the species diversification and differentiation of**  
844 **arbuscular mycorrhizal fungi (AMF)**

845 **(a-b):** Projection of 10 abiotic and biotic variables on the two principal coordinates  
846 according to the VT (a) or EU99 (b) delineations. Principal coordinate analysis (PCA) was  
847 performed for the AMF units represented by at least 10 sequences. Colors represent the  
848 contribution of the variable to the principal coordinates. The percentage for each principal  
849 coordinate (PC) indicates its amount of explained variance.

850 Tested variables were: the numbers of continents on which the AMF unit occurs  
851 (nb\_continent), of realms (nb\_realm), of ecosystems (nb\_ecosystems), of habitats  
852 (nb\_habitats), of biomes (nb\_biomes), and climatic zones (nb\_climatic) [13], as well as  
853 information about the associated plant species of each unit, such as the number of plant  
854 partners (nb\_plants), the phylogenetic diversity of these plants (PD), and the betweenness  
855 and closeness measurement of each fungal unit in the plant-fungus interaction network  
856 (see Methods).

857

858 **(c-d):** Speciation rates as a function of the PC1 coordinates for each VT (c) or EU99 (d) unit.  
859 Only the AMF consensus tree is represented here (other replicate trees are presented in  
860 Supplementary Fig. 26).

861

862 **(e-h):** Genetic diversity (Tajima's  $\theta\pi$  estimator) as a function of the PC1 (e-f) or PC2 (g-h)  
863 coordinates for each VT (e-g) or EU99 (f-h) unit. Only the AMF consensus tree is  
864 represented here (other replicate trees are presented in Supplementary Fig. 26). The grey  
865 lines indicate the statistically significant linear regression between the two variables  
866 inferred using MCMCglmm.

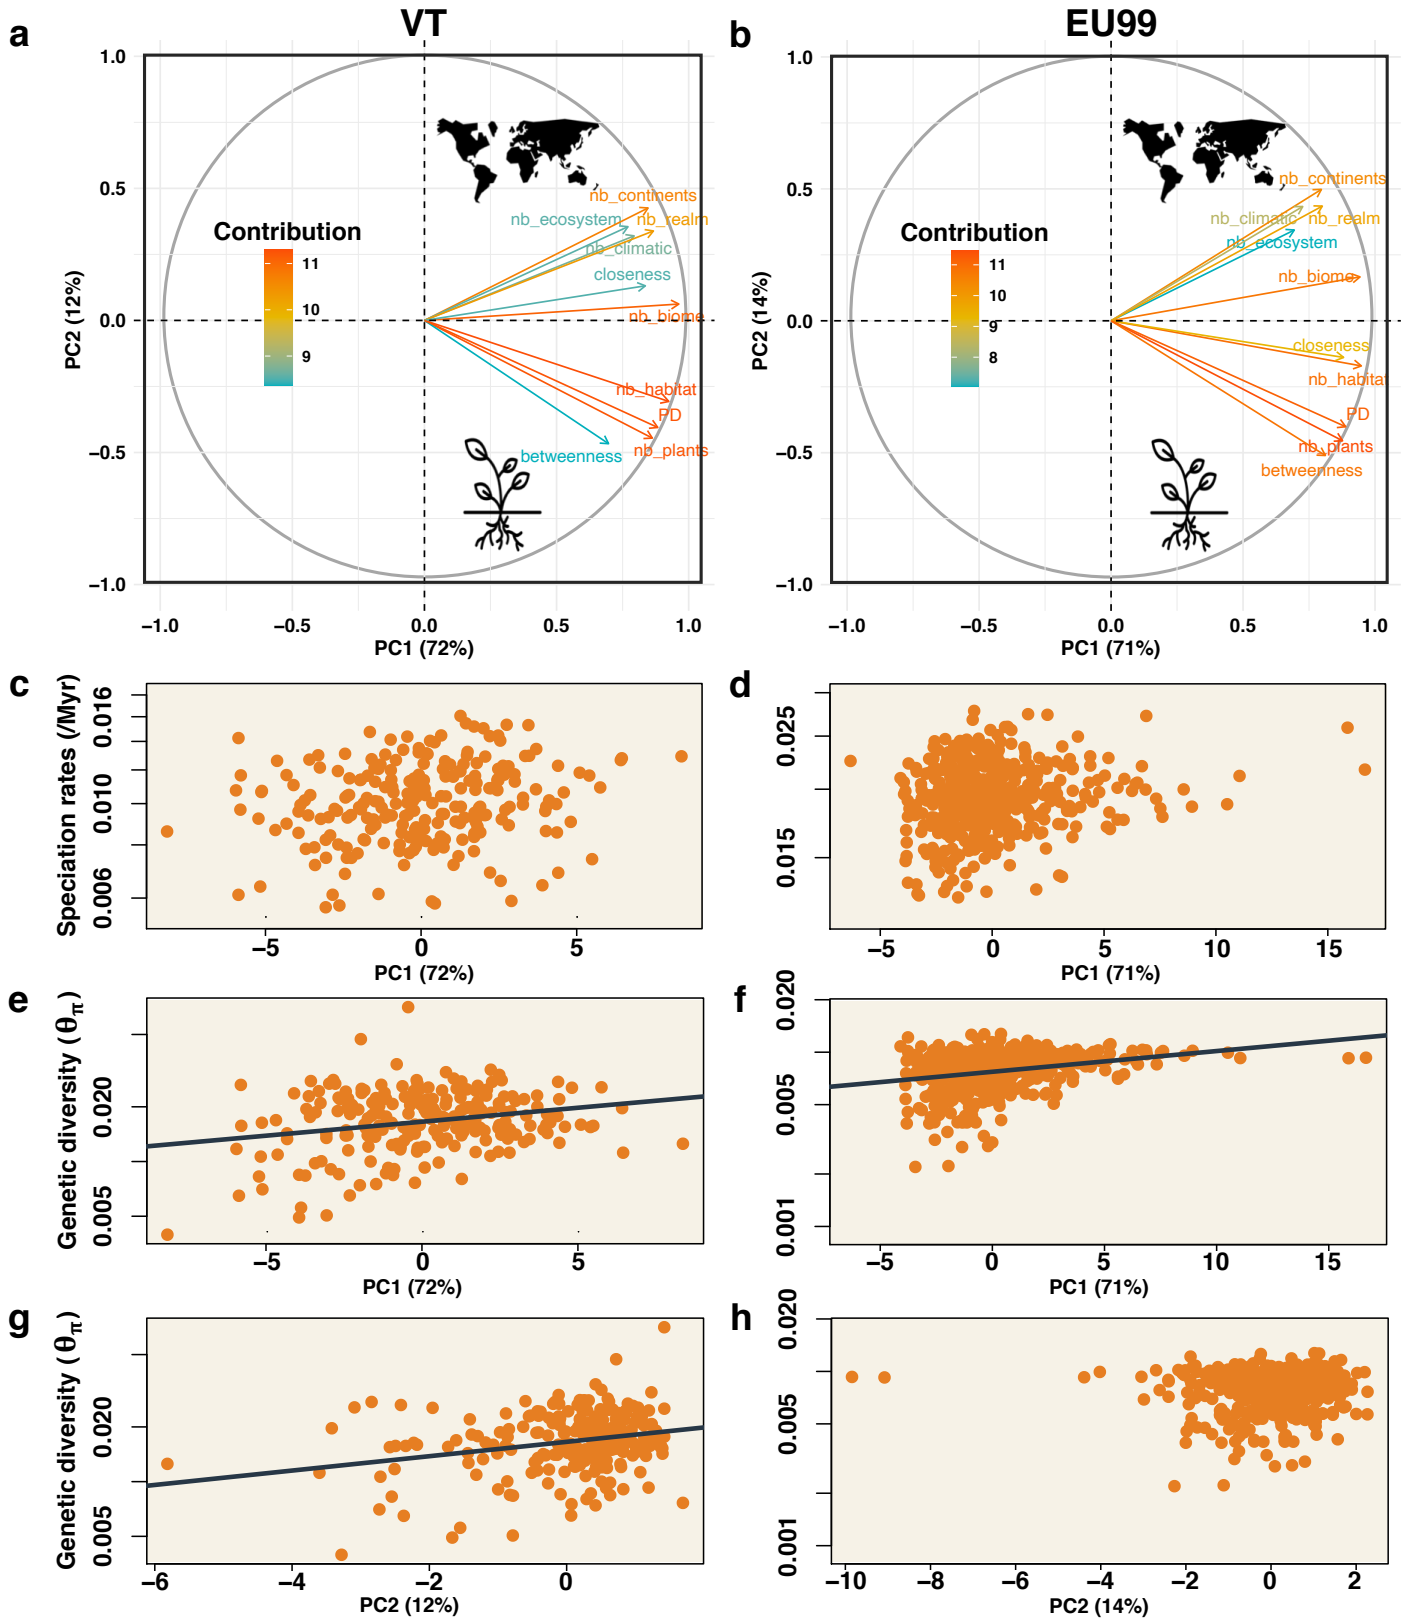

Source: https://www.biorxiv.org/content/10.1101/2020.07.28.224790v2.full.pdf
